# Supplementary material
Source: PubMed Central journal article supplement (PMC7561304)
Supplement: mmc1.pdf [file mmc1.pdf]

# THE LANCET

## Infectious Diseases

### Supplementary appendix 1

This translation in Chinese was submitted by the authors and we reproduce it as supplied. It has not been peer reviewed. *The Lancet's* editorial processes have only been applied to the original in English, which should serve as reference for this manuscript.

Supplement to: Xia S, Zhang Y, Wang Y, et al. Safety and immunogenicity of an inactivated SARS-CoV-2 vaccine, BBIBP-CorV: a randomised, double-blind, placebo-controlled, phase 1/2 trial. *Lancet Infect Dis* 2020; published online Oct 15. [https://doi.org/10.1016/S1473-3099\(20\)30831-8](https://doi.org/10.1016/S1473-3099(20)30831-8).

此简体中文译文由作者提交，我方按照提供的版本刊登。此译文并未经过同行审阅。医学期刊《柳叶刀》的编辑流程仅适用于英文原稿，英文原稿应作为此手稿的参考。

## 研究背景:

目前 COVID-19 仍处于大流行阶段, 疫情迫使研究者需加快候选疫苗的测试进程。本项研究旨在评价 BBIBP-CorV 新冠灭活疫苗的人体安全性和免疫原性。

## 研究方法:

I/II期临床研究在河南省商丘市凉源区疾病预防控制中心进行, 实验分为随机组、双盲组和安慰剂对照组。I期研究中, 192 名健康人按照年龄被分为 18-59 岁组和 60 岁以上组, 评估 2  $\mu\text{g}$ 、4  $\mu\text{g}$  或 8  $\mu\text{g}$  的疫苗效果。II期研究中, 448 名健康人(18-59 岁)被分为 4 组, 在第 0 天接种 8  $\mu\text{g}$  疫苗, 或者在第 0/14、第 0/21 或第 0/28 天接种 4  $\mu\text{g}$  疫苗。每组参与者通过随机分组(每组 8 人)并按照 3:1 的比例接受疫苗或安慰剂。对参与者、调查人员和结果评估人员屏蔽分组和分配情况。临床I期结果是疫苗安全性和耐受性。临床II期结果是疫苗的免疫原性, 即评估抗传染性 SARS-CoV-2 的中和抗体水平。本研究注册网址为 [www.chictr.org.cn](http://www.chictr.org.cn), 编号为 ChiCTR2000032459。

## 研究发现:

I期研究中, 192 名参与者(平均年龄 53.7 岁[SD 15.6])被随机分配接种疫苗(18-59 岁和 $\geq 60$  岁两组, 每组均包括 2  $\mu\text{g}$  [n=24]、4  $\mu\text{g}$  [n=24]和 8  $\mu\text{g}$  [n=24])或安慰剂(n=24)。42 例(22%)疫苗接受者最初 7 天内报告至少有 1 例不良反应。所有不良反应均为轻、中度。接种疫苗后 28 天内无严重不良事件报告。

与注射安慰剂组相比, 注射疫苗组第 42 天的中和抗体 GMT 水平较高, 具体结果为: 18-59 岁人群组, 2  $\mu\text{g}$  组为(87.74, [95% CI, 64.91-118.61]; 4  $\mu\text{g}$  组为 211.2 [95% CI, 158.95-280.64]; 8  $\mu\text{g}$  组为 228.70, [95% CI, 186.1-281.1]。在 $\geq 60$  岁人群组, 2  $\mu\text{g}$  组为 80.67, [95% CI, 65.37-99.55]; 4  $\mu\text{g}$  组为 131.46, [95% CI, 108.22-159.7]; 8  $\mu\text{g}$  组为 170.87, [95% CI, 133.02-219.48], 安慰剂组为 2.0, [95% CI, 2.0-2.0]。

II期研究中, 448 名参与者(平均年龄 41.7 岁[SD 9.9])被随机分配接种疫苗(D0 8  $\mu\text{g}$  [n=84]、D0/D14 4  $\mu\text{g}$  [n=84]、D0/D21 4  $\mu\text{g}$  [n=84]和 D0/D28 4  $\mu\text{g}$  [n=84]组)或安慰剂(n=112)。120 例(27%)疫苗接种者在最初 7 天内至少报告了一次不良反

应。注射部位最常见的不良反应是疼痛(D0 8 μg 组 25 [30%], D0/D14 4 μg 组 12[14%], D0/D21 4 μg 组 10 [10%], D0/D28 4 μg 组 2[2%])。最常见的系统性不良反应是发热(D0 8 μg 组 1 [1%],D0/D14 4 μg 组 1 [1%],D0/D21 4 μg 组 3 [4%], D0/D28 4μg 组 6[7%])。4 μg 组疫苗诱导的中和抗体滴度在 D0/D14 (169.46, [95% CI, 132.21-217.19]), D0/D21(282.71, [95% CI, 221.17-361.39])和 D0/D28(217.99, [95% CI, 181.84 – 261.33])均显著高于 D0 天接种 8μg 组 28 天的中和抗体滴度 (14.72, [95% CI 11.56-18.75]), 所有 P 值均>0.001。

## 结论:

BBIBP-CorV 的新冠灭活疫苗在两个年龄组的所有试验剂量下都是安全的, 耐受性良好。在第 42 天, 在所有年龄组中疫苗受试者均能产生针对 SARS-CoV-2 的体液反应。在 D0/21 天和 D0/28 天, 用 4 μg 疫苗进行两剂免疫, 获得的中和抗体滴度较高。同时, 受试者产生的抗体可以对不同地区流行的 SARS-Cov-2 实现中和。
