# Supplementary material
Source: PubMed Central journal article supplement (PMC7561304)
Supplement: mmc2.pdf [file mmc2.pdf]

# THE LANCET

## Infectious Diseases

### Supplementary appendix 2

This appendix formed part of the original submission and has been peer reviewed. We post it as supplied by the authors.

Supplement to: Xia S, Zhang Y, Wang Y, et al. Safety and immunogenicity of an inactivated SARS-CoV-2 vaccine, BBIBP-CorV: a randomised, double-blind, placebo-controlled, phase 1/2 trial. *Lancet Infect Dis* 2020; published online Oct 15. [https://doi.org/10.1016/S1473-3099\(20\)30831-8](https://doi.org/10.1016/S1473-3099(20)30831-8).

1 **Appendix**

2

| 3  | <b>Contents</b>                                                                                    | <b>Page</b> |
|----|----------------------------------------------------------------------------------------------------|-------------|
| 4  | Appendix 1. Neutralizing antibodies against multiple SARS-CoV-2 strains. ....                      | 2           |
| 5  | Appendix 2. Abnormal changes of laboratory tests on day 4 for 18-59 year-old group after the first |             |
| 6  | and the second vaccinations. ....                                                                  | 3           |
| 7  | Appendix 3. Abnormal changes of laboratory tests on day 4 for ≥60 year-old group after the first   |             |
| 8  | and the second vaccinations. ....                                                                  | 5           |
| 9  | Appendix 4. Statistical Analysis of neutralizing antibody GMT in 18-59 year-old group: Day 0       | 7           |
| 10 | Appendix 5. Statistical Analysis of neutralizing antibody GMT in 18-59 year-old group: Day 7       | 8           |
| 11 | Appendix 6. Statistical Analysis of neutralizing antibody GMT in 18-59 year-old group: Day 14      | 9           |
| 12 | Appendix 7. Statistical Analysis of neutralizing antibody GMT in 18-59 year-old group: Day 28      | 10          |
| 13 | Appendix 8. Statistical Analysis of neutralizing antibody GMT in 18-59 year-old group: Day 32      | 11          |
| 14 | Appendix 9. Statistical Analysis of neutralizing antibody GMT in 18-59 year-old group: Day 42      | 12          |
| 15 | Appendix 10. Statistical Analysis of neutralizing antibody GMT in ≥60 year-old group: Day 0        | 13          |
| 16 | Appendix 11. Statistical Analysis of neutralizing antibody GMT in ≥60 year-old group: Day 7        | 14          |
| 17 | Appendix 12. Statistical Analysis of neutralizing antibody GMT in ≥60 year-old group: Day 14       | 15          |
| 18 | Appendix 13. Statistical Analysis of neutralizing antibody GMT in ≥60 year-old group: Day 28       | 16          |
| 19 | Appendix 14. Statistical Analysis of neutralizing antibody GMT in ≥60 year-old group: Day 32       | 17          |
| 20 | Appendix 15. Statistical Analysis of neutralizing antibody GMT in ≥60 year-old group: Day 42       | 18          |
| 21 | Appendix 16. Statistical Analysis of neutralizing antibody GMT in four immunization schedules:     |             |
| 22 | Day 0 .....                                                                                        | 19          |
| 23 | Appendix 17. Statistical Analysis of neutralizing antibody GMT in two immunization schedules:      |             |
| 24 | Day 14 .....                                                                                       | 20          |
| 25 | Appendix 18. Statistical Analysis of neutralizing antibody GMT in four immunization schedules:     |             |
| 26 | Day 28 .....                                                                                       | 21          |
| 27 | Appendix 19. Neighbor-joining phylogenetic tree for SARS-Cov-2 isolates in neutralizing assay      |             |
| 28 | .....                                                                                              | 22          |
| 29 | Appendix 20. Method for infectious SARS-Cov-2 neutralizing assay .....                             | 23          |
| 30 | Appendix 21. Detail information for screened subjects in Phase 1/2.....                            | 24          |

31

32 **Appendix 1. Neutralizing antibodies against multiple SARS-CoV-2 strains.**

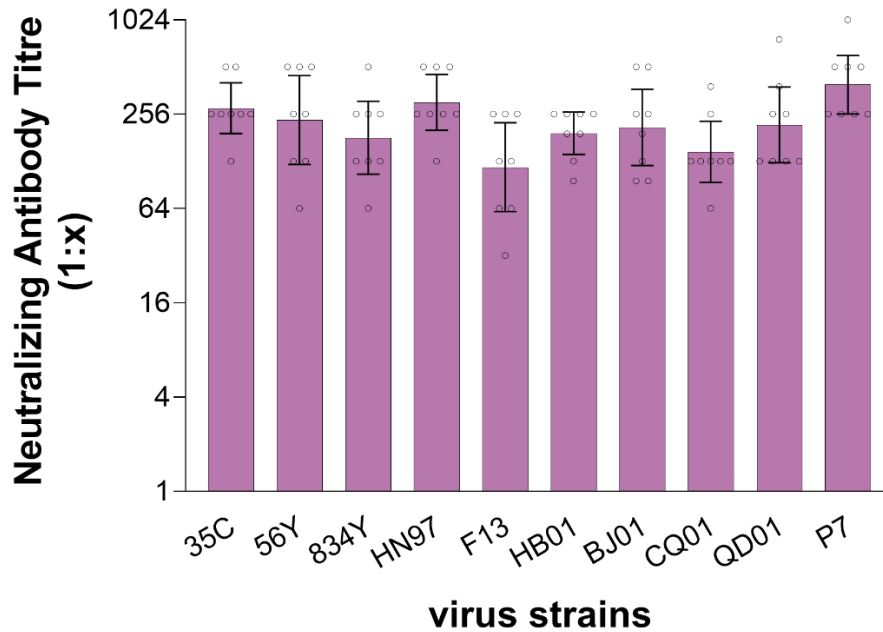

33  
34 Note: The neutralizing antibodies GMT at day 42 from 6 vaccine recipients randomly  
35 selected from 4 µg/dose cohorts were determined. Abbreviations: 35T, human-BetaCoV-  
36 IVDC-35T-2020; 56Y, human-BetaCoV-IVDC-56Y-2020; 834Y, human-BetaCoV-IVDC-  
37 834Y-2020; HN97, human-BetaCoV-IVDC-HN97-2020; F13, environment-BetaCoV-IVDC-  
38 F13-2020; HB01, 19nCoV-CDC-Tan-Strain01; CQ01, 19nCoV-CDC-Tan-Strain03 (CQ01);  
39 QD01, 19nCoV-CDC-Tan-Strain04; BJ01, 19nCoV-CDC-Tan-Strain05 (BJ01); P7, passage  
40 7 virus stock for vaccine manufacture. Data were shown as geometric mean with 95% CIs.  
41

**Appendix 2. Abnormal changes of laboratory tests on day 4 for 18-59 year-old group after the first and the second vaccinations.**

| Abnormal in Laboratory measures |         | 2 µg (n=32)        |               | 4 µg (n=32)        |               | 8 µg (n=32)        |               | Total (n=96)       |                |
|---------------------------------|---------|--------------------|---------------|--------------------|---------------|--------------------|---------------|--------------------|----------------|
|                                 |         | vaccination (n=24) | placebo (n=8) | vaccination (n=24) | placebo (n=8) | vaccination (n=24) | placebo (n=8) | vaccination (n=72) | placebo (n=24) |
| WBC                             | Any     | 0                  | 0             | 0                  | 0             | 0                  | 0             | 0                  | 0              |
|                                 | Grade 1 | 0                  | 0             | 0                  | 0             | 0                  | 0             | 0                  | 0              |
|                                 | Grade 2 | 0                  | 0             | 0                  | 0             | 0                  | 0             | 0                  | 0              |
|                                 | Grade 3 | 0                  | 0             | 0                  | 0             | 0                  | 0             | 0                  | 0              |
| HGB                             | Any     | 0                  | 0             | 1(4.2%)            | 0             | 0                  | 0             | 1(1.4%)            | 0              |
|                                 | Grade 1 | 0                  | 0             | 1(4.2%)            | 0             | 0                  | 0             | 1(1.4%)            | 0              |
|                                 | Grade 2 | 0                  | 0             | 0                  | 0             | 0                  | 0             | 0                  | 0              |
|                                 | Grade 3 | 0                  | 0             | 0                  | 0             | 0                  | 0             | 0                  | 0              |
| ALT                             | Any     | 0                  | 0             | 0                  | 0             | 0                  | 0             | 0                  | 0              |
|                                 | Grade 1 | 0                  | 0             | 0                  | 0             | 0                  | 0             | 0                  | 0              |
|                                 | Grade 2 | 0                  | 0             | 0                  | 0             | 0                  | 0             | 0                  | 0              |
|                                 | Grade 3 | 0                  | 0             | 0                  | 0             | 0                  | 0             | 0                  | 0              |
| BUN                             | Any     | 0                  | 0             | 1(4.2%)            | 0             | 0                  | 0             | 1(1.4%)            | 0              |
|                                 | Grade 1 | 0                  | 0             | 1(4.2%)            | 0             | 0                  | 0             | 1(1.4%)            | 0              |
|                                 | Grade 2 | 0                  | 0             | 0                  | 0             | 0                  | 0             | 0                  | 0              |
|                                 | Grade 3 | 0                  | 0             | 0                  | 0             | 0                  | 0             | 0                  | 0              |
| AST                             | Any     | 0                  | 0             | 0                  | 0             | 0                  | 0             | 0                  | 0              |
|                                 | Grade 1 | 0                  | 0             | 0                  | 0             | 0                  | 0             | 0                  | 0              |
|                                 | Grade 2 | 0                  | 0             | 0                  | 0             | 0                  | 0             | 0                  | 0              |
|                                 | Grade 3 | 0                  | 0             | 0                  | 0             | 0                  | 0             | 0                  | 0              |

|       |         |          |          |          |          |        |   |           |          |
|-------|---------|----------|----------|----------|----------|--------|---|-----------|----------|
| GLU   | Any     | 7(29.2%) | 0        | 0        | 2(25%)   | 0      | 0 | 7(9.7%)   | 2(8.3%)  |
|       | Grade 1 | 4(16.7%) | 0        | 0        | 2(25%)   | 0      | 0 | 4(5.6%)   | 2(8.3%)  |
|       | Grade 2 | 3(12.5%) | 0        | 0        | 0        | 0      | 0 | 3(4.2%)   | 0        |
|       | Grade 3 | 0        | 0        | 0        | 0        | 0      | 0 | 0         | 0        |
| TBIL  | Any     | 4(16.7%) | 1(12.5%) | 4(16.7%) | 2(25%)   | 6(25%) | 0 | 14(19.4%) | 9(37.5%) |
|       | Grade 1 | 4(16.7%) | 1(12.5%) | 4(16.7%) | 1(12.5%) | 6(25%) | 0 | 14(19.4%) | 8(33.3%) |
|       | Grade 2 | 0        | 0        | 0        | 1(12.5%) | 0      | 0 | 0         | 1(4.2%)  |
|       | Grade 3 | 0        | 0        | 0        | 0        | 0      | 0 | 0         | 0        |
| PRO   | Any     | 0        | 0        | 1(4.2%)  | 0        | 0      | 0 | 1(1.4%)   | 0        |
|       | Grade 1 | 0        | 0        | 1(4.2%)  | 0        | 0      | 0 | 1(1.4%)   | 0        |
|       | Grade 2 | 0        | 0        | 0        | 0        | 0      | 0 | 0         | 0        |
|       | Grade 3 | 0        | 0        | 0        | 0        | 0      | 0 | 0         | 0        |
| U-GLU | Any     | 1(4.2%)  | 0        | 0        | 0        | 0      | 0 | 1(1.4%)   | 0        |
|       | Grade 1 | 1(4.2%)  | 0        | 0        | 0        | 0      | 0 | 1(1.4%)   | 0        |
|       | Grade 2 | 0        | 0        | 0        | 0        | 0      | 0 | 0         | 0        |
|       | Grade 3 | 0        | 0        | 0        | 0        | 0      | 0 | 0         | 0        |

Data are n (%). WBC, white blood cells; HGB, hemoglobin; ALT, alanine aminotransferase; BUN, blood urea nitrogen; AST, aspartate aminotransferase; GLU, blood glucose; TBIL, serum total bilirubin; PRO, urinary protein; U-GLU, urinary glucose.

**Appendix 3. Abnormal changes of laboratory tests on day 4 for ≥60 year-old group after the first and the second vaccinations.**

| Abnormal in Laboratory measures |         | 2 µg (n=32)        |               | 4 µg (n=32)        |               | 8 µg (n=32)        |               | Total (n=96)       |                |
|---------------------------------|---------|--------------------|---------------|--------------------|---------------|--------------------|---------------|--------------------|----------------|
|                                 |         | vaccination (n=24) | placebo (n=8) | vaccination (n=24) | placebo (n=8) | vaccination (n=24) | placebo (n=8) | vaccination (n=72) | placebo (n=24) |
| WBC                             | Any     | 0                  | 0             | 1(4.2%)            | 0             | 0                  | 1(4.2%)       | 1(1.4%)            | 0              |
|                                 | Grade 1 | 0                  | 0             | 0                  | 0             | 0                  | 0             | 0                  | 0              |
|                                 | Grade 2 | 0                  | 0             | 1(4.2%)            | 0             | 0                  | 1(4.2%)       | 1(1.4%)            | 0              |
|                                 | Grade 3 | 0                  | 0             | 0                  | 0             | 0                  | 0             | 0                  | 0              |
| HGB                             | Any     | 0                  | 0             | 0                  | 0             | 3(12.5%)           | 0             | 3(4.2%)            | 0              |
|                                 | Grade 1 | 0                  | 0             | 0                  | 0             | 3(12.5%)           | 0             | 3(4.2%)            | 0              |
|                                 | Grade 2 | 0                  | 0             | 0                  | 0             | 0                  | 0             | 0                  | 0              |
|                                 | Grade 3 | 0                  | 0             | 0                  | 0             | 0                  | 0             | 0                  | 0              |
| ALT                             | Any     | 0                  | 0             | 2(8.3%)            | 1(12.5%)      | 0                  | 0             | 2(2.8%)            | 1(4.2%)        |
|                                 | Grade 1 | 0                  | 0             | 2(8.3%)            | 1(12.5%)      | 0                  | 0             | 2(2.8%)            | 1(4.2%)        |
|                                 | Grade 2 | 0                  | 0             | 0                  | 0             | 0                  | 0             | 0                  | 0              |
|                                 | Grade 3 | 0                  | 0             | 0                  | 0             | 0                  | 0             | 0                  | 0              |
| BUN                             | Any     | 4(16.7%)           | 1(12.5%)      | 0                  | 0             | 0                  | 0             | 4(5.6%)            | 1(4.2%)        |
|                                 | Grade 1 | 4(16.7%)           | 1(12.5%)      | 0                  | 0             | 0                  | 0             | 4(5.6%)            | 1(4.2%)        |
|                                 | Grade 2 | 0                  | 0             | 0                  | 0             | 0                  | 0             | 0                  | 0              |
|                                 | Grade 3 | 0                  | 0             | 0                  | 0             | 0                  | 0             | 0                  | 0              |
| AST                             | Any     | 1(4.2%)            | 0             | 2(8.3%)            | 0             | 1(4.2%)            | 0             | 4(5.6%)            | 0              |
|                                 | Grade 1 | 1(4.2%)            | 0             | 2(8.3%)            | 0             | 1(4.2%)            | 0             | 4(5.6%)            | 0              |
|                                 | Grade 2 | 0                  | 0             | 0                  | 0             | 0                  | 0             | 0                  | 0              |
|                                 | Grade 3 | 0                  | 0             | 0                  | 0             | 0                  | 0             | 0                  | 0              |
| GLU                             | Any     | 2(8.3%)            | 2(25%)        | 0                  | 4(50%)        | 8(33.3%)           | 4(50%)        | 10(13.9%)          | 10(41.7%)      |
|                                 | Grade 1 | 2(8.3%)            | 2(25%)        | 0                  | 3(37.5%)      | 8(33.3%)           | 4(50%)        | 10(13.9%)          | 9(37.5%)       |

|       |         |          |          |         |          |   |   |          |          |
|-------|---------|----------|----------|---------|----------|---|---|----------|----------|
|       | Grade 2 | 0        | 0        | 0       | 1(12.5%) | 0 | 0 | 0        | 0        |
|       | Grade 3 | 0        | 0        | 0       | 0        | 0 | 0 | 0        | 0        |
| TBIL  | Any     | 8(33.3%) | 4(50%)   | 1(4.2%) | 0        | 0 | 0 | 9(12.5%) | 4(16.7%) |
|       | Grade 1 | 7(29.2%) | 3(37.5%) | 1(4.2%) | 0        | 0 | 0 | 8(11.1%) | 3(12.5%) |
|       | Grade 2 | 1(4.2%)  | 1(12.5%) | 0       | 0        | 0 | 0 | 1(1.4%)  | 1(4.2%)  |
|       | Grade 3 | 0        | 0        | 0       | 0        | 0 | 0 | 0        | 0        |
| PRO   | Any     | 3(12.5%) | 0        | 0       | 0        | 0 | 0 | 3(4.2%)  | 0        |
|       | Grade 1 | 3(12.5%) | 0        | 0       | 0        | 0 | 0 | 3(4.2%)  | 0        |
|       | Grade 2 | 0        | 0        | 0       | 0        | 0 | 0 | 0        | 0        |
|       | Grade 3 | 0        | 0        | 0       | 0        | 0 | 0 | 0        | 0        |
| U-GLU | Any     | 0        | 0        | 1(4.2%) | 0        | 0 | 0 | 0        | 1(4.2%)  |
|       | Grade 1 | 0        | 0        | 1(4.2%) | 0        | 0 | 0 | 0        | 1(4.2%)  |
|       | Grade 2 | 0        | 0        | 0       | 0        | 0 | 0 | 0        | 0        |
|       | Grade 3 | 0        | 0        | 0       | 0        | 0 | 0 | 0        | 0        |

Data are n (%). WBC, white blood cells; HGB, hemoglobin; ALT, alanine aminotransferase; BUN, blood urea nitrogen; AST, aspartate aminotransferase; GLU, blood glucose; TBIL, serum total bilirubin; PRO, urinary protein; U-GLU, urinary glucose.

#### Appendix 4. Statistical Analysis of neutralizing antibody GMT in 18-59 year-old group: Day 0

|                             | 2 µg group (n=32)     |                  | 4 µg group (n=32)     |                  | 8 µg group (n=32)     |                  |
|-----------------------------|-----------------------|------------------|-----------------------|------------------|-----------------------|------------------|
|                             | vaccination<br>(n=24) | placebo<br>(n=8) | vaccination<br>(n=24) | placebo<br>(n=8) | vaccination<br>(n=24) | placebo<br>(n=8) |
| Subjects with a Valid Assay | 24                    | 8                | 24                    | 8                | 24                    | 8                |
| Geometric Mean              | 2.1189                | 2                | 2.1189                | 2                | 2.1189                | 2                |
| Lower 95%CI , Upper 95% CI  | 1.9508,2.3014         | 2,2              | 1.9508,2.3014         | 2,2              | 1.9508,2.3014         | 2,2              |
| Median                      | 2                     | 2                | 2                     | 2                | 2                     | 2                |
| Min, Max                    | 2,4                   | 2,2              | 2,4                   | 2,2              | 2,4                   | 2,2              |
| t-test 95% CI vs. placebo   | --                    | --               | --                    | --               | --                    | --               |
| t-test 95% CI vs. 4 µg      | -0.3281,0.3281        | --               | --                    | --               | --                    | --               |
| t-test 95% CI vs. 8 µg      | -0.3281,0.3281        | --               | -0.3281,0.3281        | --               | --                    | --               |
| t-test p-value vs. placebo  | --                    | --               | --                    | --               | --                    | --               |
| t-test p-value vs. 4 µg     | >0.99                 | --               | --                    | --               | --                    | --               |
| t-test p-value vs. 8 µg     | >0.99                 | --               | >0.99                 | --               | --                    | --               |

Note: t-test 95% CIs and p-values are calculated using a 2 sample t-test.



**Appendix 5. Statistical Analysis of neutralizing antibody GMT in 18-59 year-old group: Day 7**

|                             | 2 µg group (n=32)  |               | 4 µg group (n=32)  |               | 8 µg group (n=32)  |               |
|-----------------------------|--------------------|---------------|--------------------|---------------|--------------------|---------------|
|                             | vaccination (n=24) | placebo (n=8) | vaccination (n=24) | placebo (n=8) | vaccination (n=24) | placebo (n=8) |
| Subjects with a Valid Assay | 24                 | 8             | 24                 | 8             | 24                 | 8             |
| Geometric Mean              | 3.9718             | 2             | 4.7233             | 2             | 5.2757             | 2             |
| Lower 95%CI, Upper 95% CI   | 3.156,4.9986       | 2,2           | 3.6775,6.0665      | 2,2           | 4.0865,6.8109      | 2,2           |
| Median                      | 4                  | 2             | 4                  | 2             | 4                  | 2             |
| Min, Max                    | 2,12               | 2,2           | 2,16               | 2,2           | 2,32               | 2,2           |
| t-test 95% CI vs. placebo   | --                 | --            | --                 | --            | --                 | --            |
| t-test 95% CI vs. 4 µg      | -0.7718,2.7718     | --            | --                 | --            | --                 | --            |
| t-test 95% CI vs. 8 µg      | -0.7238,4.5571     | --            | -1.8804,3.7137     | --            | --                 | --            |
| t-test p-value vs. placebo  | --                 | --            | --                 | --            | --                 | --            |
| t-test p-value vs. 4 µg     | 0.46               | --            | --                 | --            | --                 | --            |
| t-test p-value vs. 8 µg     | 0.28               | --            | 0.97               | --            | --                 | --            |

Note: t-test 95% CIs and p-values are calculated using a 2 sample t-test.

**Appendix 6. Statistical Analysis of neutralizing antibody GMT in 18-59 year-old group: Day 14**

|                             | 2 µg group (n=32)  |               | 4 µg group (n=32)  |               | 8 µg group (n=32)  |               |
|-----------------------------|--------------------|---------------|--------------------|---------------|--------------------|---------------|
|                             | vaccination (n=24) | placebo (n=8) | vaccination (n=24) | placebo (n=8) | vaccination (n=24) | placebo (n=8) |
| Subjects with a Valid Assay | 24                 | 8             | 24                 | 8             | 24                 | 8             |
| Geometric Mean              | 9.334              | 2             | 11.9605            | 2             | 12.1642            | 2             |
| Lower 95%CI, Upper 95% CI   | 7.785,11.1912      | 2,2           | 9.384,15.2444      | 2,2           | 9.6324,15.3614     | 2,2           |
| Median                      | 8                  | 2             | 14                 | 2             | 14                 | 2             |
| Min, Max                    | 4,32               | 2,2           | 4,32               | 2,2           | 2,32               | 2,2           |
| t-test 95% CI vs. placebo   | --                 | --            | --                 | --            | --                 | --            |
| t-test 95% CI vs. 4 µg      | -0.3995,7.5662     | --            | --                 | --            | --                 | --            |
| t-test 95% CI vs. 8 µg      | -0.1446,6.9779     | --            | -4.3413,4.008      | --            | --                 | --            |
| t-test p-value vs. placebo  | --                 | --            | --                 | --            | --                 | --            |
| t-test p-value vs. 4 µg     | 0.21               | --            | --                 | --            | --                 | --            |
| t-test p-value vs. 8 µg     | 0.17               | --            | >0.99              | --            | --                 | --            |

Note: t-test 95% CIs and p-values are calculated using a 2 sample t-test.

**Appendix 7. Statistical Analysis of neutralizing antibody GMT in 18-59 year-old group: Day 28**

|                             | 2 µg group (n=32)  |               | 4 µg group (n=32)  |               | 8 µg group (n=32)  |               |
|-----------------------------|--------------------|---------------|--------------------|---------------|--------------------|---------------|
|                             | vaccination (n=24) | placebo (n=8) | vaccination (n=24) | placebo (n=8) | vaccination (n=24) | placebo (n=8) |
| Subjects with a Valid Assay | 24                 | 8             | 24                 | 8             | 24                 | 8             |
| Geometric Mean              | 22.5783            | 2             | 29.2805            | 2             | 36.7105            | 2,2           |
| Lower 95%CI, Upper 95% CI   | 18.9087,26.9600    | 2,2           | 23.8135,36.0026    | 2,2           | 29.8274,45.1819    | 2,2           |
| Median                      | 28                 | 2             | 32                 | 2             | 32                 | 2             |
| Min, Max                    | 12,48              | 2,2           | 12,64              | 2,2           | 12,128             | 2,2           |
| t-test 95% CI vs. placebo   | --                 | --            | --                 | --            | --                 | --            |
| t-test 95% CI vs. 4 µg      | 0.6589,15.6745     | --            | --                 | --            | --                 | --            |
| t-test 95% CI vs. 8 µg      | 6.3805,27.6195     | --            | -2.8534,20.5201    | --            | --                 | --            |
| t-test p-value vs. placebo  | --                 | --            | --                 | --            | --                 | --            |
| t-test p-value vs. 4 µg     | 0.13               | --            | --                 | --            | --                 | --            |
| t-test p-value vs. 8 µg     | 0.0093             | --            | 0.58               | --            | --                 | --            |

Note: t-test 95% CIs and p-values are calculated using a 2 sample t-test.

**Appendix 8. Statistical Analysis of neutralizing antibody GMT in 18-59 year-old group: Day 32**

|                             | 2 µg group (n=32)  |               | 4 µg group (n=32)  |               | 8 µg group (n=32)  |               |
|-----------------------------|--------------------|---------------|--------------------|---------------|--------------------|---------------|
|                             | vaccination (n=24) | placebo (n=8) | vaccination (n=24) | placebo (n=8) | vaccination (n=24) | placebo (n=8) |
| Subjects with a Valid Assay | 24                 | 8             | 24                 | 8             | 24                 | 8             |
| Geometric Mean              | 41.9082            | 2             | 84.8271            | 2             | 94.3385            | 2             |
| Lower 95%CI, Upper 95% CI   | 33.472,52.4706     | 2,2           | 65.3675,110.0797   | 2,2           | 80.0485,111.1795   | 2,2           |
| Median                      | 48                 | 2             | 96                 | 2             | 96                 | 2             |
| Min, Max                    | 12,96              | 2,2           | 32,256             | 2,2           | 48,192             | 2,2           |
| t-test 95% CI vs. placebo   | --                 | --            | --                 | --            | --                 | --            |
| t-test 95% CI vs. 4 µg      | 27.9666,79.0334    | --            | --                 | --            | --                 | --            |
| t-test 95% CI vs. 8 µg      | 35.8098,72.5236    | --            | -28.2923,29.6256   | --            | --                 | --            |
| t-test p-value vs. placebo  | --                 | --            | --                 | --            | --                 | --            |
| t-test p-value vs. 4 µg     | <0.001             | --            | --                 | --            | --                 | --            |
| t-test p-value vs. 8 µg     | <0.001             | --            | >0.99              | --            | --                 | --            |

Note: t-test 95% CIs and p-values are calculated using a 2 sample t-test.

**Appendix 9. Statistical Analysis of neutralizing antibody GMT in 18-59 year-old group: Day 42**

|                             | 2 µg group (n=32)  |               | 4 µg group (n=32)  |               | 8 µg group (n=32)  |               |
|-----------------------------|--------------------|---------------|--------------------|---------------|--------------------|---------------|
|                             | vaccination (n=24) | placebo (n=8) | vaccination (n=24) | placebo (n=8) | vaccination (n=24) | placebo (n=8) |
| Subjects with a Valid Assay | 24                 | 8             | 24                 | 8             | 24                 | 8             |
| Geometric Mean              | 87.7423            | 2             | 211.2041           | 2             | 228.695            | 2             |
| Lower 95%CI, Upper 95% CI   | 64.9066,118.6122   | 2,2           | 158.95,280.6366    | 2,2           | 186.0746,281.0777  | 2,2           |
| Median                      | 96                 | 2             | 256                | 2             | 256                | 2             |
| Min, Max                    | 16,256             | 2,2           | 64,768             | 2,2           | 128,768            | 2,2           |
| t-test 95% CI vs. placebo   | --                 | --            | --                 | --            | --                 | --            |
| t-test 95% CI vs. 4 µg      | 73.6855,230.9805   | --            | --                 | --            | --                 | --            |
| t-test 95% CI vs. 8 µg      | 82.3201,217.0139   | --            | -97.7631,92.4298   | --            | --                 | --            |
| t-test p-value vs. placebo  | --                 | --            | --                 | --            | --                 | --            |
| t-test p-value vs. 4 µg     | 0.0016             | --            | --                 | --            | --                 | --            |
| t-test p-value vs. 8 µg     | <0.001             | --            | >0.99              | --            | --                 | --            |

Note: t-test 95% CIs and p-values are calculated using a 2 sample t-test.

**Appendix 10. Statistical Analysis of neutralizing antibody GMT in  $\geq 60$  year-old group: Day 0**

|                                    | 2 $\mu\text{g}$ group (n=32) |               | 4 $\mu\text{g}$ group (n=32) |               | 8 $\mu\text{g}$ group (n=32) |               |
|------------------------------------|------------------------------|---------------|------------------------------|---------------|------------------------------|---------------|
|                                    | vaccination (n=24)           | placebo (n=8) | vaccination (n=24)           | placebo (n=8) | vaccination (n=24)           | placebo (n=8) |
| Subjects with a Valid Assay        | 23                           | 8             | 24                           | 8             | 24                           | 8             |
| Geometric Mean                     | 22.1243                      | 2             | 2.4898                       | 2             | 2.3107                       | 2             |
| Lower 95%CI, Upper 95% CI          | 1.9486,2.3159                | 2,2           | 2.141,2.8954                 | 2,2           | 2.0465,2.609                 | 2,2           |
| Median                             | 2                            | 2             | 2                            | 2             | 2                            | 2             |
| Min, Max                           | 2,4                          | 2,2           | 2,6                          | 2,2           | 2,4                          | 2,2           |
| t-test 95% CI vs. placebo          | --                           | --            | ---                          | --            | --                           | --            |
| t-test 95% CI vs. 4 $\mu\text{g}$  | -0.0375,1.0231               | --            | --                           | --            | --                           | --            |
| t-test 95% CI vs. 8 $\mu\text{g}$  | -0.1787,0.6642               | --            | -0.8258,0.3258               | --            | --                           | --            |
| t-test p-value vs. placebo         | --                           | --            | --                           | --            | --                           | --            |
| t-test p-value vs. 4 $\mu\text{g}$ | 0.24                         | --            | --                           | --            | --                           | --            |
| t-test p-value vs. 8 $\mu\text{g}$ | 0.42                         | --            | 0.91                         | --            | --                           | --            |

Note: t-test 95% CIs and p-values are calculated using a 2 sample t-test.

**Appendix 11. Statistical Analysis of neutralizing antibody GMT in ≥60 year-old group: Day 7**

|                             | 2 µg group (n=32)  |               | 4 µg group (n=32)  |               | 8 µg group (n=32)  |               |
|-----------------------------|--------------------|---------------|--------------------|---------------|--------------------|---------------|
|                             | vaccination (n=24) | placebo (n=8) | vaccination (n=24) | placebo (n=8) | vaccination (n=24) | placebo (n=8) |
| Subjects with a Valid Assay | 23                 | 8             | 24                 | 8             | 24                 | 8             |
| Geometric Mean              | 2.3253             | 2.181         | 3.3235             | 2             | 3.668              | 2             |
| Lower 95%CI, Upper 95% CI   | 1.9906,2.7162      | 1.777,2.6769  | 2.4967,4.4241      | 2,2           | 2.7438,4.9035      | 2,2           |
| Median                      | 2                  | 2             | 2                  | 2             | 2                  | 2             |
| Min, Max                    | 2,8                | 2,4           | 2,24               | 2,2           | 2,16               | 2,2           |
| t-test 95% CI vs. placebo   | --                 | --            | --                 | --            | --                 | --            |
| t-test 95% CI vs. 4 µg      | -0.1664,3.9562     | --            | --                 | --            | --                 | --            |
| t-test 95% CI vs. 8 µg      | 0.5412,3.7486      | --            | -2.1811,2.6811     | --            | --                 | --            |
| t-test p-value vs. placebo  | --                 | --            | --                 | --            | --                 | --            |
| t-test p-value vs. 4 µg     | 0.24               | --            | --                 | --            | --                 | --            |
| t-test p-value vs. 8 µg     | 0.039              | --            | 0.97               | --            | --                 | --            |

Note: t-test 95% CIs and p-values are calculated using a 2 sample t-test.

**Appendix 12. Statistical Analysis of neutralizing antibody GMT in ≥60 year-old group: Day 14**

|                             | 2 µg group (n=32)  |               | 4 µg group (n=32)  |               | 8 µg group (n=32)  |               |
|-----------------------------|--------------------|---------------|--------------------|---------------|--------------------|---------------|
|                             | vaccination (n=24) | placebo (n=8) | vaccination (n=24) | placebo (n=8) | vaccination (n=24) | placebo (n=8) |
| Subjects with a Valid Assay | 23                 | 8             | 24                 | 8             | 24                 | 8             |
| Geometric Mean              | 4.6744             | 2             | 6.9093             | 2             | 6.6652             | 2             |
| Lower 95%CI, Upper 95% CI   | 3.2589,6.7048      | 2,2           | 4.9472,9.6495      | 2,2           | 4.7564,9.3399      | 2,2           |
| Median                      | 2                  | 2             | 2                  | 2             | 2                  | 2             |
| Min, Max                    | 2,24               | 2,2           | 2,32               | 2,2           | 2,24               | 2,2           |
| t-test 95% CI vs. placebo   | --                 | --            | --                 | --            | --                 | --            |
| t-test 95% CI vs. 4 µg      | -1.3355,6.2847     | --            | --                 | --            | --                 | --            |
| t-test 95% CI vs. 8 µg      | -1.421,5.5369      | --            | -4.1286,3.2953     | --            | --                 | --            |
| t-test p-value vs. placebo  | --                 | --            | --                 | --            | --                 | --            |
| t-test p-value vs. 4 µg     | 0.24               | --            | --                 | --            | --                 | --            |
| t-test p-value vs. 8 µg     | 0.42               | --            | 0.97               | --            | --                 | --            |

Note: t-test 95% CIs and p-values are calculated using a 2 sample t-test.



**Appendix 13. Statistical Analysis of neutralizing antibody GMT in ≥60 year-old group: Day 28**

|                             | 2 µg group (n=32)  |               | 4 µg group (n=32)  |               | 8 µg group (n=32)  |               |
|-----------------------------|--------------------|---------------|--------------------|---------------|--------------------|---------------|
|                             | vaccination (n=24) | placebo (n=8) | vaccination (n=24) | placebo (n=8) | vaccination (n=24) | placebo (n=8) |
| Subjects with a Valid Assay | 23                 | 8             | 24                 | 8             | 24                 | 8             |
| Geometric Mean              | 13.3534            | 2             | 18.8931            | 2             | 23.7415            | 2             |
| Lower 95%CI, Upper 95% CI   | 9.3861,18.9977     | 2,2           | 13.4277,26.5831    | 2,2           | 19.0374,29.6079    | 2,2           |
| Median                      | 2                  | 2             | 2                  | 2             | 8                  | 2             |
| Min, Max                    | 2,64               | 2,2           | 2,64               | 2,2           | 8,64               | 2,2           |
| t-test 95% CI vs. placebo   | --                 | --            | --                 | --            | --                 | --            |
| t-test 95% CI vs. 4 µg      | -2.1949,16.5645    | --            | --                 | --            | --                 | --            |
| t-test 95% CI vs. 8 µg      | 0.9606,17.822      | --            | -7.4789,11.8919    | --            | --                 | --            |
| t-test p-value vs. placebo  | --                 | --            | --                 | --            | --                 | --            |
| t-test p-value vs. 4 µg     | 0.24               | --            | --                 | --            | --                 | --            |
| t-test p-value vs. 8 µg     | 0.087              | --            | 0.96               | --            | --                 | --            |

Note: t-test 95% CIs and p-values are calculated using a 2 sample t-test.

**Appendix 14. Statistical Analysis of neutralizing antibody GMT in ≥60 year-old group: Day 32**

|                             | 2 µg group (n=32)  |               | 4 µg group (n=32)  |               | 8 µg group (n=32)  |               |
|-----------------------------|--------------------|---------------|--------------------|---------------|--------------------|---------------|
|                             | vaccination (n=24) | placebo (n=8) | vaccination (n=24) | placebo (n=8) | vaccination (n=24) | placebo (n=8) |
| Subjects with a Valid Assay | 23                 | 8             | 24                 | 8             | 23                 | 7             |
| Geometric Mean              | 31.3697            | 2             | 60.7051            | 2             | 73.3171            | 2             |
| Lower 95%CI, Upper 95% CI   | 21.6505,45.4519    | 2,2           | 46.3498,79.5065    | 2,2           | 59.5107,90.3265    | 2,2           |
| Median                      | 2                  | 2             | 16                 | 2             | 24                 | 2             |
| Min, Max                    | 2,128              | 2,2           | 16,128             | 2,2           | 24,128             | 2,2           |
| t-test 95% CI vs. placebo   | --                 | --            | --                 | --            | --                 | --            |
| t-test 95% CI vs. 4 µg      | 11.0532,51.0338    | --            | --                 | --            | --                 | --            |
| t-test 95% CI vs. 8 µg      | 21.4778,58.6962    | --            | 12.5433,30.6302    | --            | --                 | --            |
| t-test p-value vs. placebo  | --                 | --            | --                 | --            | --                 | --            |
| t-test p-value vs. 4 µg     | 0.018              | --            | --                 | --            | --                 | --            |
| t-test p-value vs. 8 µg     | <0.001             | --            | 0.91               | --            | --                 | --            |

Note: t-test 95% CIs and p-values are calculated using a 2 sample t-test.

**Appendix 15. Statistical Analysis of neutralizing antibody GMT in ≥60 year-old group: Day 42**

|                             | 2 µg group (n=32)  |               | 4 µg group (n=32)     |               | 8 µg group (n=32)     |               |
|-----------------------------|--------------------|---------------|-----------------------|---------------|-----------------------|---------------|
|                             | vaccination (n=24) | placebo (n=8) | vaccination (n=24)    | placebo (n=8) | vaccination (n=24)    | placebo (n=8) |
| Subjects with a Valid Assay | 23                 | 8             | 24                    | 8             | 23                    | 7             |
| Geometric Mean              | 80.6666            | 2             | 131.4649              | 2             | 170.8679              | 2             |
| Lower 95%CI, Upper 95% CI   | 65.3651,99.5501    | 2,2           | 108.2188,159.704<br>4 | 2,2           | 133.0249,219.47<br>65 | 2,2           |
| Median                      | 32                 | 2             | 64                    | 2             | 128                   | 2             |
| Min, Max                    | 32,256             | 2,2           | 64,256                | 2,2           | 64,512                | 2,2           |
| t-test 95% CI vs. placebo   | --                 | --            | --                    | --            | --                    | --            |
| t-test 95% CI vs. 4 µg      | 19.0552,89.3506    | --            | --                    | --            | --                    | --            |
| t-test 95% CI vs. 8 µg      | 53.9459,164.4881   | --            | -2.0559,112.0849      | --            | --                    | --            |
| t-test p-value vs. placebo  | --                 | --            | --                    | --            | --                    | --            |
| t-test p-value vs. 4 µg     | 0.018              | --            | --                    | --            | --                    | --            |
| t-test p-value vs. 8 µg     | 0.0013             | --            | 0.30                  | --            | --                    | --            |

Note: t-test 95% CIs and p-values are calculated using a 2 sample t-test.

**Appendix 16. Statistical Analysis of neutralizing antibody GMT in four immunization schedules: Day 0**

|                                | D0 8 µg (n=112)    |                | D0/D14 4 µg (n=112) |                | D0/D21 4 µg (n=112) |                | D0/D28 8 µg (n=112) |                |
|--------------------------------|--------------------|----------------|---------------------|----------------|---------------------|----------------|---------------------|----------------|
|                                | vaccination (n=84) | placebo (n=28) | vaccination (n=84)  | placebo (n=28) | vaccination (n=84)  | placebo (n=28) | vaccination (n=84)  | placebo (n=28) |
| Subjects with a Valid Assay    | 84                 | 28             | 84                  | 28             | 84                  | 28             | 83                  | 28             |
| Geometric Mean                 | 2                  | 2              | 2.1189              | 2              | 2.0501              | 2              | 2                   | 2              |
| Lower 95%CI, Upper 95% CI      | 2,2                | 2,2            | 2.0321, 2.2094      | 1.9486, 2.1569 | 1.9933, 2.1085      | 2,2            | 2,2                 | 2,2            |
| Median                         | 2                  | 2              | 2                   | 2              | 2                   | 2              | 2                   | 2              |
| Min, Max                       | 2,2                | 2,2            | 2,4                 | 2,4            | 2,4                 | 2,2            | 2,2                 | 2,2            |
| t-test 95% CI vs. placebo      | --                 | --             | --                  | --             | --                  | --             | --                  | --             |
| t-test 95% CI vs. D0/D14 4 µg  | --                 | --             | --                  | --             | --                  | --             | --                  | --             |
| t-test 95% CI vs. D0/D21 4 µg  | --                 | --             | -0.2395, 0.0491     | --             | --                  | --             | --                  | --             |
| t-test 95% CI vs. D0/D28 8 µg  | --                 | --             | -0.2872, -0.0462    | --             | -0.1524, 0.0095     | --             | --                  | --             |
| t-test 95% CI vs. D0 8 µg      | --                 | --             | -0.2865, -0.0469    | --             | -0.1519, 0.009      | --             | 0,0                 | --             |
| t-test p-value vs. placebo     | --                 | --             | --                  | --             | --                  | --             | --                  | --             |
| t-test p-value vs. D0/D14 4 µg | 0.0067             | --             | --                  | --             | --                  | --             | --                  | --             |
| t-test p-value vs. D0/D21 4 µg | 0.081              | --             | 0.19                | --             | --                  | --             | --                  | --             |
| t-test p-value vs. D0/D28 4 µg | --                 | --             | 0.014               | --             | 0.16                | --             | --                  | --             |

Note: t-test 95% CIs and p-values are calculated using a 2 sample t-test.

**Appendix 17. Statistical Analysis of neutralizing antibody GMT in two immunization schedules: Day 14**

|                             | D0/D14 (n=112)     |                | D0/D21 (n=112)     |                |
|-----------------------------|--------------------|----------------|--------------------|----------------|
|                             | vaccination (n=84) | placebo (n=28) | vaccination (n=84) | placebo (n=28) |
| Subjects with a Valid Assay | 42                 | 14             | 42                 | 14             |
| Geometric Mean              | 104.8727           | 2              | 218.9276           | 2              |
| Lower 95%CI, Upper 95% CI   | 79.0492,139.1322   | 2,2            | 165.5551,289.5066  | 2,2            |
| Median                      | 128                | 2              | 160                | 2              |
| Min, Max                    | 8,512              | 2,2            | 64,1536            | 2,2            |
| t-test 95% CI vs. placebo   | --                 | --             | --                 | --             |
| t-test 95% CI vs. D0/D14    | --                 | --             | --                 | --             |
| t-test 95% CI vs. D0/D21    | 64.1611,291.6489   | --             | --                 | --             |
| t-test p-value vs. placebo  | --                 | --             | --                 | --             |
| t-test p-value vs. D0/D14   | --                 | --             | --                 | --             |
| t-test p-value vs. D0/D21   | 0.0077             | --             | --                 | --             |

Note: t-test 95% CIs and p-values are calculated using a 2 sample t-test.

**Appendix 18. Statistical Analysis of neutralizing antibody GMT in four immunization schedules: Day 28**

|                                | D0 8 µg (n=112)    |                | D0/D14 4 µg (n=112)  |                | D0/D21 4 µg (n=112)  |                | D0/D28 8 µg (n=112)  |                |
|--------------------------------|--------------------|----------------|----------------------|----------------|----------------------|----------------|----------------------|----------------|
|                                | vaccination (n=84) | placebo (n=28) | vaccination (n=84)   | placebo (n=28) | vaccination (n=84)   | placebo (n=28) | vaccination (n=84)   | placebo (n=28) |
| Subjects with a Valid Assay    | 84                 | 28             | 42                   | 14             | 39                   | 13             | 83                   | 28             |
| Geometric Mean                 | 14.7236            | 2              | 169.4554             | 2              | 282.7149             | 2              | 217.992              | 2              |
| Lower 95%CI, Upper 95% CI      | 11.5589, 18.7548   | 2,2            | 132.2147, 217.1857   | 2,2            | 221.1665, 361.3916   | 2,2            | 181.8380, 261.3343   | 2,2            |
| Median                         | 16                 | 2              | 128                  | 2              | 256                  | 2              | 192                  | 2              |
| Min, Max                       | 2,128              | 2              | 32,512               | 2,2            | 32,1024              | 2,2            | 64,1024              | 2              |
| t-test 95% CI vs. placebo      | --                 | --             | --                   | --             | --                   | --             | --                   | --             |
| t-test 95% CI vs. D0/D14 4 µg  | --                 | --             | --                   | --             | --                   | --             | --                   | --             |
| t-test 95% CI vs. D0/D21 4 µg  | --                 | --             | 40.7376, 207.6424    | --             | --                   | --             | --                   | --             |
| t-test 95% CI vs. D0/D28 8 µg  | --                 | --             | -10.6283, 167.2503   | --             | -140.4675, 48.7085   | --             | --                   | --             |
| t-test 95% CI vs. D0 8 µg      | --                 | --             | -242.4607, -166.8253 | --             | -373.0712, -284.5948 | --             | -339.8796, -226.0284 | --             |
| t-test p-value vs. placebo     | --                 | --             | --                   | --             | --                   | --             | --                   | --             |
| t-test p-value vs. D0/D14 4 µg | <0.001             | --             | --                   | --             | --                   | --             | --                   | --             |
| t-test p-value vs. D0/D21 4 µg | <0.001             | --             | 0.0081               | --             | --                   | --             | --                   | --             |
| t-test p-value vs. D0/D28 4 µg | <0.001             | --             | 0.084                | --             | 0.34                 | --             | --                   | --             |

Note: t-test 95% CIs and p-values are calculated using a 2 sample t-test.

**Appendix 19. Neighbor-joining phylogenetic tree for SARS-Cov-2 isolates in neutralizing assay**

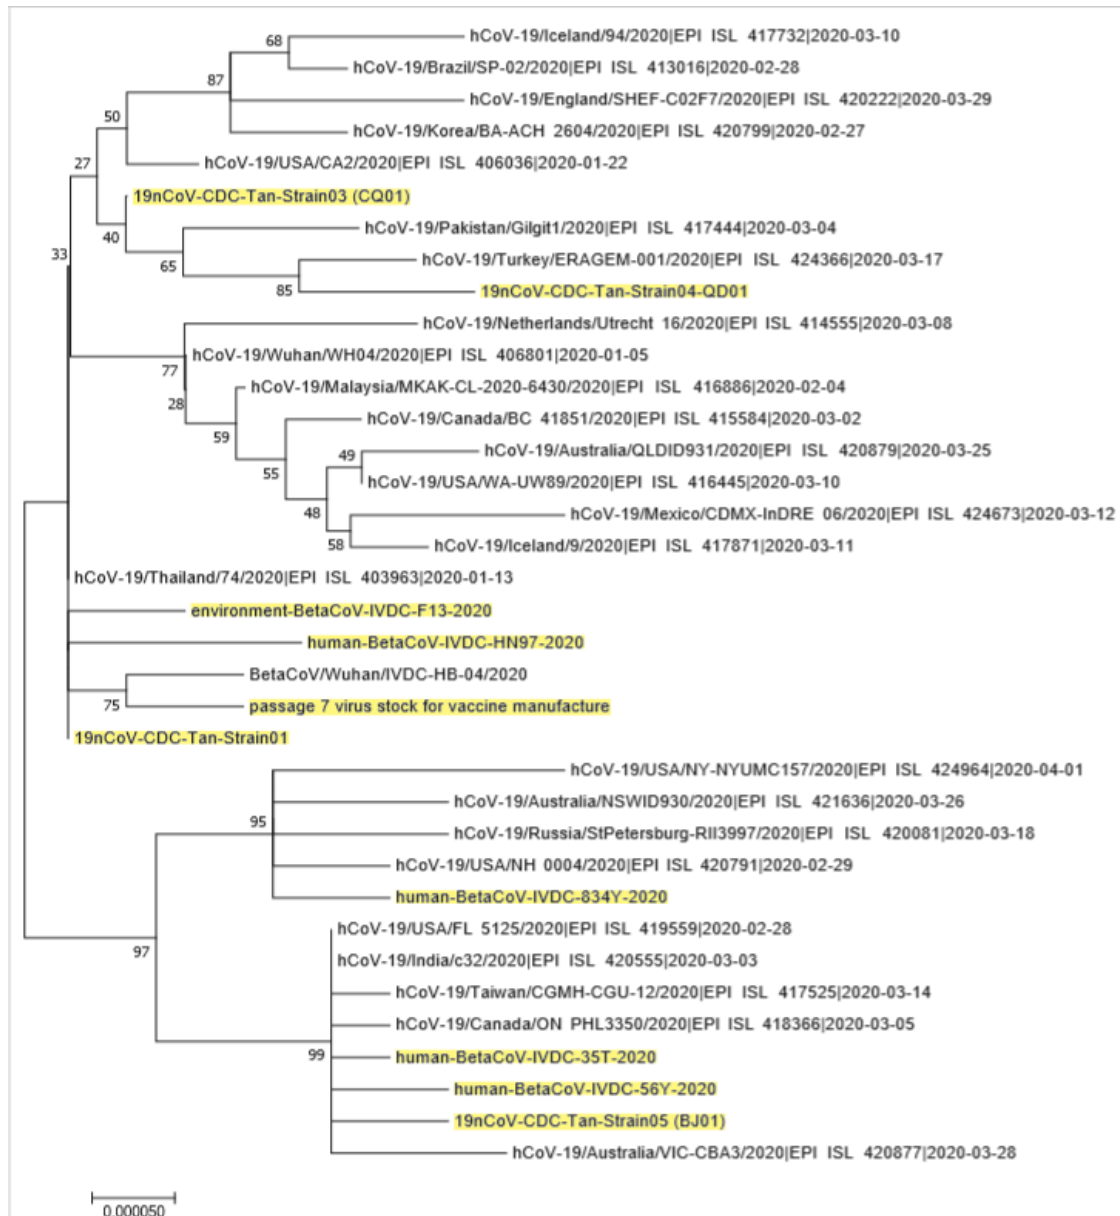

Note: SARS-Cov-2 isolates used in neutralizing assay include human-BetaCoV-IVDC-35T-2020 (35T), human-BetaCoV-IVDC-56Y-2020 (56Y), human-BetaCoV-IVDC-834Y-2020 (834Y), human-BetaCoV-IVDC-HN97-2020 (HN97), environment-BetaCoV-IVDC-F13-2020 (F13), 19nCoV-CDC-Tan-Strain01 (HB01), 19nCoV-CDC-Tan-Strain03 (CQ01), 19nCoV-CDC-Tan-Strain04 (QD01), 19nCoV-CDC-Tan-Strain05 (BJ01), passage 7 virus stock for vaccine manufacture (P7) are highlighted in yellow.

## **Appendix 20. Method for infectious SARS-Cov-2 neutralizing assay**

Serum was successively diluted 1:4 to the required concentration by a 2-fold series, and an equal volume of challenge virus solution was added. After neutralization in a 37 °C incubator for 2 h, a  $1.0\sim 2.5\times 10^5$ /ml cell suspension was added to the wells (0.1 ml/well) and cultured in a CO<sub>2</sub> incubator at 37 ° C for 4 days. Titers expressed as the reciprocal of the highest dilution protecting 50% cell from virus challenge. Convalescent sera is included as a internal positive control in every assay, and the range of the NAb titer is 1:128 – 1:384. Seroconversion is defined as 4-fold increment in antibody titer relative to day 0.



**Appendix 21. Detail information for screened subjects in Phase 1/2**

|                                  | Total screened | Informed consent | Informed consent failure | Physical examination failure | Other withdraws | Total enrolled |
|----------------------------------|----------------|------------------|--------------------------|------------------------------|-----------------|----------------|
| <b>Phase 1</b>                   |                |                  |                          |                              |                 |                |
| 18-59 yrs<br>(2 µg/dose)         | 63             | 59               | 0                        | 27                           | 4               | 32             |
| 18-59 yrs<br>(4 µg/dose)         | 73             | 71               | 1                        | 39                           | 1               | 32             |
| 18-59 yrs<br>(8 µg/dose)         | 65             | 60               | 3                        | 28                           | 2               | 32             |
| ≥60 yrs<br>(2 µg/dose)           | 109            | 96               | 12                       | 64                           | 1               | 32             |
| ≥60 yrs<br>(4 µg/dose)           | 60             | 58               | 1                        | 26                           | 1               | 32             |
| ≥60 yrs<br>(8 µg/dose)           | 96             | 88               | 7                        | 56                           | 1               | 32             |
| <b>Phase 2</b>                   |                |                  |                          |                              |                 |                |
| 18-59 yrs<br>(4 µg/dose, D0/D14) | 146            | 139              | 4                        | 27                           | 3               | 112            |
| 18-59 yrs<br>(4 µg/dose, D0/D21) | 143            | 140              | 1                        | 28                           | 2               | 112            |
| 18-59 yrs<br>(4 µg/dose, D0/D28) | 139            | 132              | 2                        | 20                           | 5               | 112            |
| 18-59 yrs<br>(8 µg/dose, D0)     | 118            | 118              | 0                        | 6                            | 0               | 112            |
